# Supplementary material for: Combinatorial Interactions Are Required for the Efficient Recruitment of Pho Repressive Complex (PhoRC) to Polycomb Response Elements
Source: PubMed Central journal article supplement (PMC4091789; doi:10.1371/journal.pgen.1004495), 2014-07-10

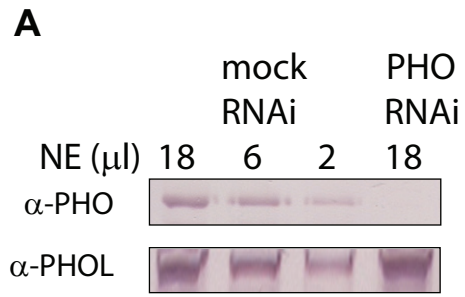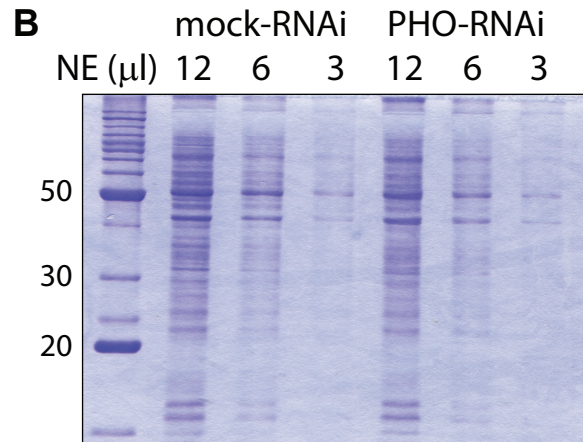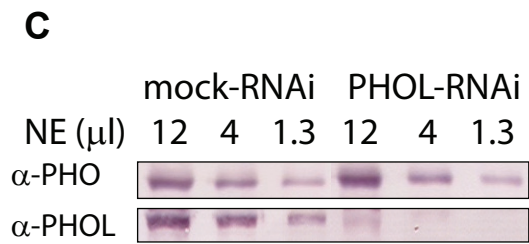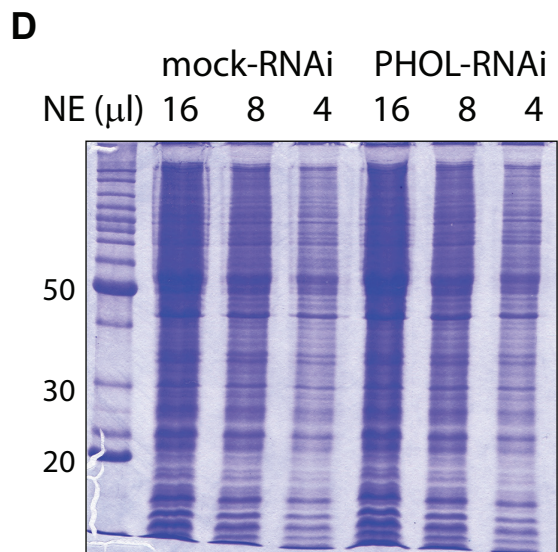

Supplement: pgen.1004495.s002.pdf [file pgen.1004495.s002.pdf]
